# Supplementary material for: Antioxidative and Metabolic Contribution to Salinity Stress Responses in Two Rapeseed Cultivars during the Early Seedling Stage
Source: MDPI journal article supplement (doi:10.3390/antiox10081227), 2021-07-30
Supplement: s1 [file s1]

**Table S1.** Means of FG%, GR, VI (I), and VI (II) of the studied cultivars in the germination stage under salinity stress during the seed germination stage.

| Treatments | Germination traits | Yangza 11                | Zhongshuang 11          | Huayouza 62              | Fengyou 520               | Yangyou 9                |
|------------|--------------------|--------------------------|-------------------------|--------------------------|---------------------------|--------------------------|
| 0 mM       | FG%                | 97.00±0.6 <sup>a-e</sup> | 92.00±1.2 <sup>g</sup>  | 97.83±0.6 <sup>a-d</sup> | 99.50±0.3 <sup>a</sup>    | 95.83±1.2 <sup>b-f</sup> |
|            | GR                 | 96.42±0.5 <sup>bc</sup>  | 77.09±0.5 <sup>j</sup>  | 95.01±0.2 <sup>cd</sup>  | 98.38±0.4 <sup>a</sup>    | 94.69±0.5 <sup>d</sup>   |
|            | VI (I)             | 725.6±7.5 <sup>cd</sup>  | 715.7±7.5 <sup>de</sup> | 812.8±2.4 <sup>b</sup>   | 1011±6.0 <sup>a</sup>     | 761.1±9.6 <sup>c</sup>   |
|            | VI (II)            | 45.64±0.5 <sup>gh</sup>  | 39.25±0.9 <sup>i</sup>  | 54.62±0.8 <sup>d</sup>   | 53.32±0.9 <sup>de</sup>   | 50.11±0.7 <sup>ef</sup>  |
| 50 mM      | FG%                | 99.67±0.3 <sup>a</sup>   | 86.00±1.2 <sup>h</sup>  | 96.83±0.6 <sup>a-e</sup> | 99.67±0.3 <sup>a</sup>    | 98.00±0.6 <sup>a-d</sup> |
|            | GR                 | 91.09±0.7 <sup>f</sup>   | 61.81±0.7 <sup>m</sup>  | 92.82±0.4 <sup>e</sup>   | 97.71±0.7 <sup>ab</sup>   | 94.72±0.4 <sup>d</sup>   |
|            | VI (I)             | 674.3±4.5 <sup>e</sup>   | 559.1±9.0 <sup>f</sup>  | 699.6±3.5 <sup>de</sup>  | 814.6±2.7 <sup>b</sup>    | 1039±5.6 <sup>a</sup>    |
|            | VI (II)            | 55.37±0.8 <sup>d</sup>   | 49.46±1.4 <sup>f</sup>  | 73.69±1.4 <sup>a</sup>   | 69.71±1.9 <sup>b</sup>    | 73.60±0.5 <sup>a</sup>   |
| 100 mM     | FG%                | 98.33±0.9 <sup>abc</sup> | 71.83±1.2 <sup>i</sup>  | 94.33±0.9 <sup>efg</sup> | 99.00±0.6 <sup>ab</sup>   | 97.83±1.2 <sup>a-d</sup> |
|            | GR                 | 69.56±0.8 <sup>k</sup>   | 50.45±0.4 <sup>n</sup>  | 83.36±0.4 <sup>h</sup>   | 96.73±0.2 <sup>b</sup>    | 93.82±0.1 <sup>de</sup>  |
|            | VI (I)             | 442.2±0.7 <sup>h</sup>   | 274.8±1.1 <sup>i</sup>  | 511.3±0.8 <sup>g</sup>   | 564.5±7.9 <sup>f</sup>    | 828.4±9.0 <sup>b</sup>   |
|            | VI (II)            | 43.65±0.4 <sup>h</sup>   | 33.70±0.1 <sup>j</sup>  | 62.22±1.3 <sup>c</sup>   | 63.78±2.4 <sup>c</sup>    | 63.77±2.6 <sup>c</sup>   |
| 150 mM     | FG%                | 95.17±1.5 <sup>c-f</sup> | 50.83±0.6 <sup>k</sup>  | 86.83±1.7 <sup>h</sup>   | 94.83±1.2 <sup>defg</sup> | 96.00±1.2 <sup>b-f</sup> |
|            | GR                 | 65.94±0.6 <sup>l</sup>   | 32.63±0.3 <sup>r</sup>  | 81.16±0.5 <sup>i</sup>   | 75.68±0.4 <sup>g</sup>    | 93.97±0.4 <sup>de</sup>  |
|            | VI (I)             | 276.9±7.5 <sup>i</sup>   | 136.1±3.2 <sup>k</sup>  | 312.9±9.2 <sup>i</sup>   | 315.6±4.2 <sup>i</sup>    | 441.5±1.7 <sup>h</sup>   |
|            | VI (II)            | 33.59±0.2 <sup>j</sup>   | 14.69±0.4 <sup>m</sup>  | 37.78±1.0 <sup>i</sup>   | 37.66±0.4 <sup>i</sup>    | 47.95±1.5 <sup>fg</sup>  |
| 200 mM     | FG%                | 83.83±1.2 <sup>h</sup>   | 24.00±1.2 <sup>m</sup>  | 45.83±1.2 <sup>l</sup>   | 62.50±1.4 <sup>j</sup>    | 92.83±1.2 <sup>fg</sup>  |
|            | GR                 | 43.43±0.6 <sup>o</sup>   | 12.68±0.4 <sup>s</sup>  | 37.62±0.4 <sup>q</sup>   | 40.02±0.5 <sup>p</sup>    | 87.77±0.4 <sup>g</sup>   |
|            | VI (I)             | 209.0±1.1 <sup>j</sup>   | 44.65±1.7 <sup>m</sup>  | 91.77±3.9 <sup>l</sup>   | 75.78±0.3 <sup>lm</sup>   | 204.0±3.9 <sup>j</sup>   |
|            | VI (II)            | 23.27±0.7 <sup>l</sup>   | 5.02±0.3 <sup>n</sup>   | 14.06±0.3 <sup>m</sup>   | 15.40±0.5 <sup>m</sup>    | 30.35±0.5 <sup>k</sup>   |

FG%: final germination percentage; GR: germination rate; VI (I): vigor index I, and VI (II): vigor index II.

Data presented are mean (±SE) of three replicates. The difference in letters indicates significant differences at (P < 0.05) using Duncan's multiple range tests.

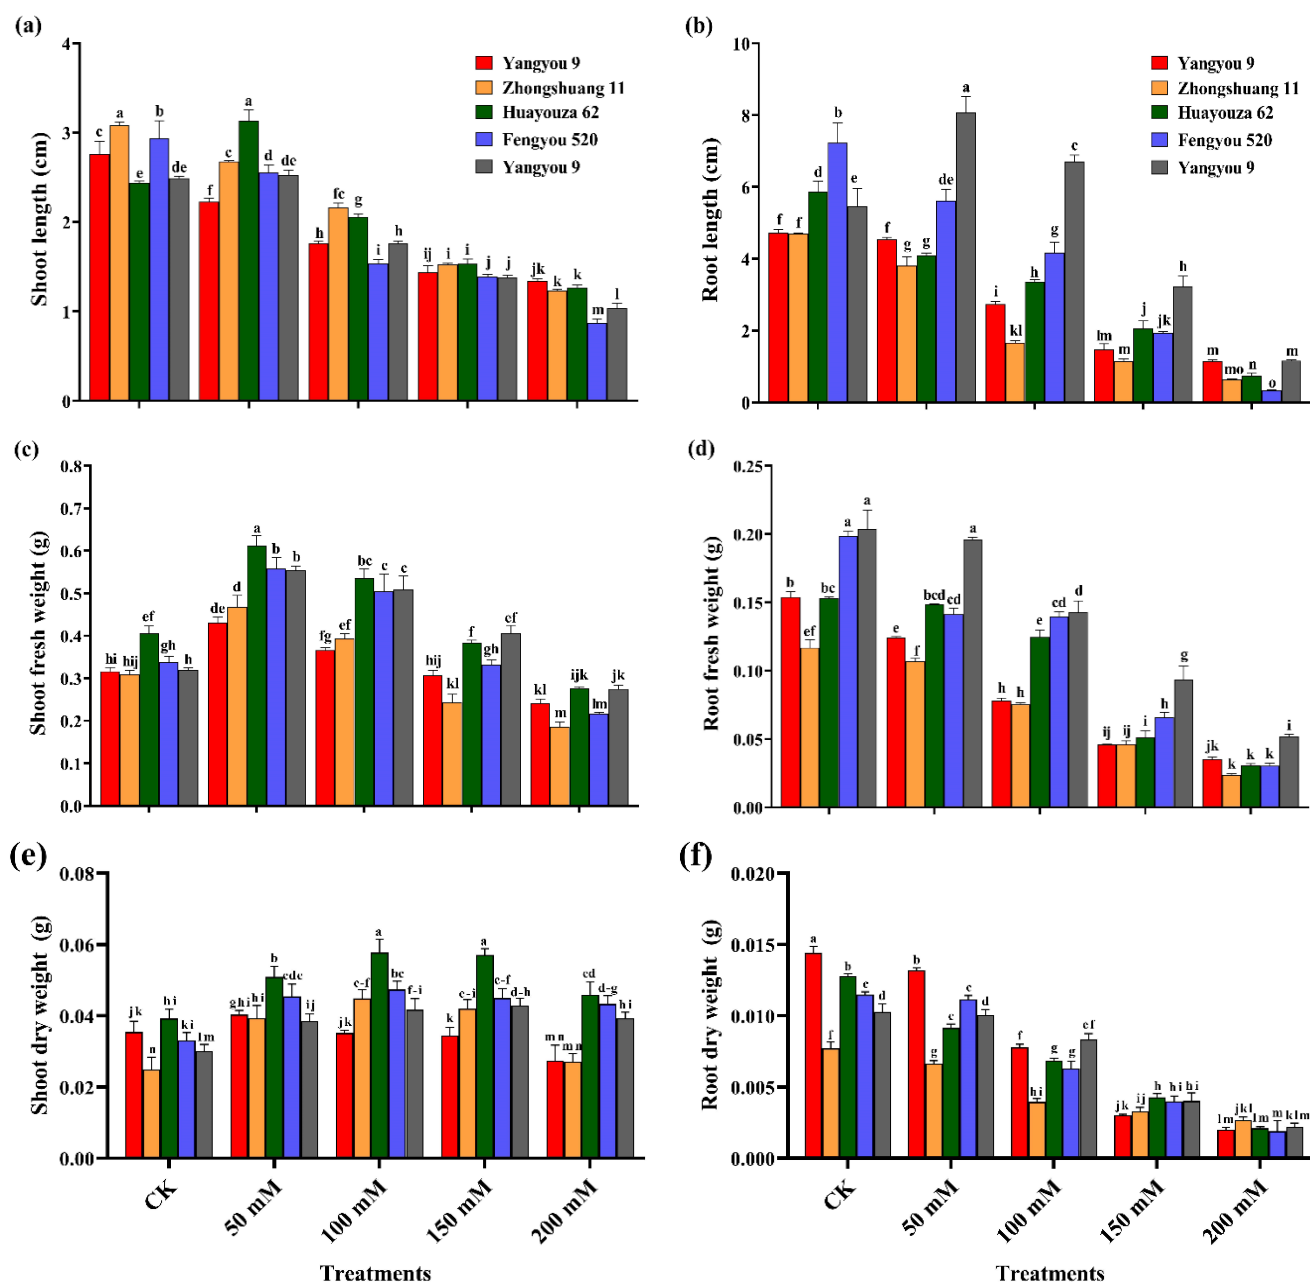

**Figure S1.** The impact of NaCl treatments on (a) shoot length (cm); (b) root length (cm); (c) shoot fresh weight (g); (d) root fresh weight (g); (e) shoot dry weight (g), and (f) root dry weight (g) of five rapeseed cultivars during the early seedling stage. Bars represent  $\pm$  SE of three replicates. The difference in letters indicates significant differences at ( $P < 0.05$ ) using Duncan's multiple range tests.

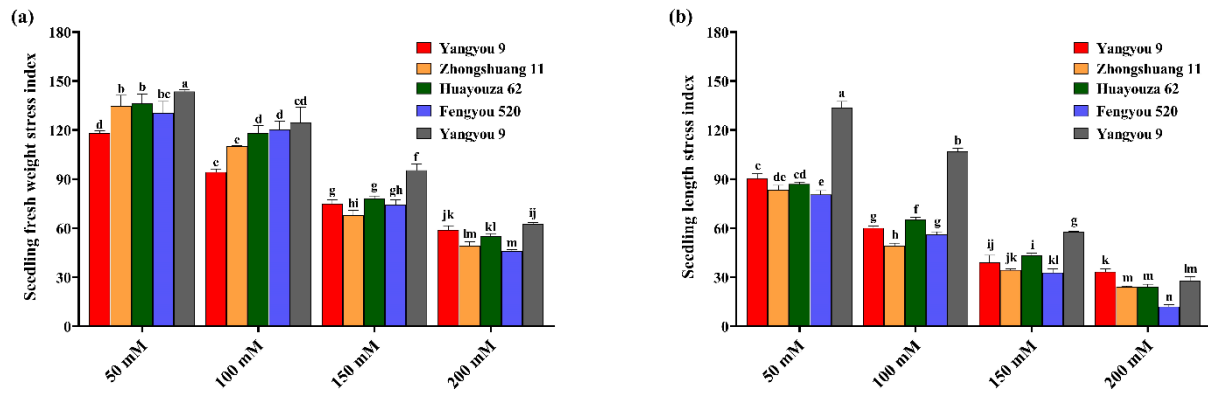

**Figure S2.** The impact of NaCl treatments on (a) seedling fresh weight stress index and (b) seedling length stress index of five rapeseed cultivars during the germination stage. Bars represent  $\pm$  SE of three replicates. The difference in letters indicates significant differences at ( $P < 0.05$ ) using Duncan's multiple range tests.

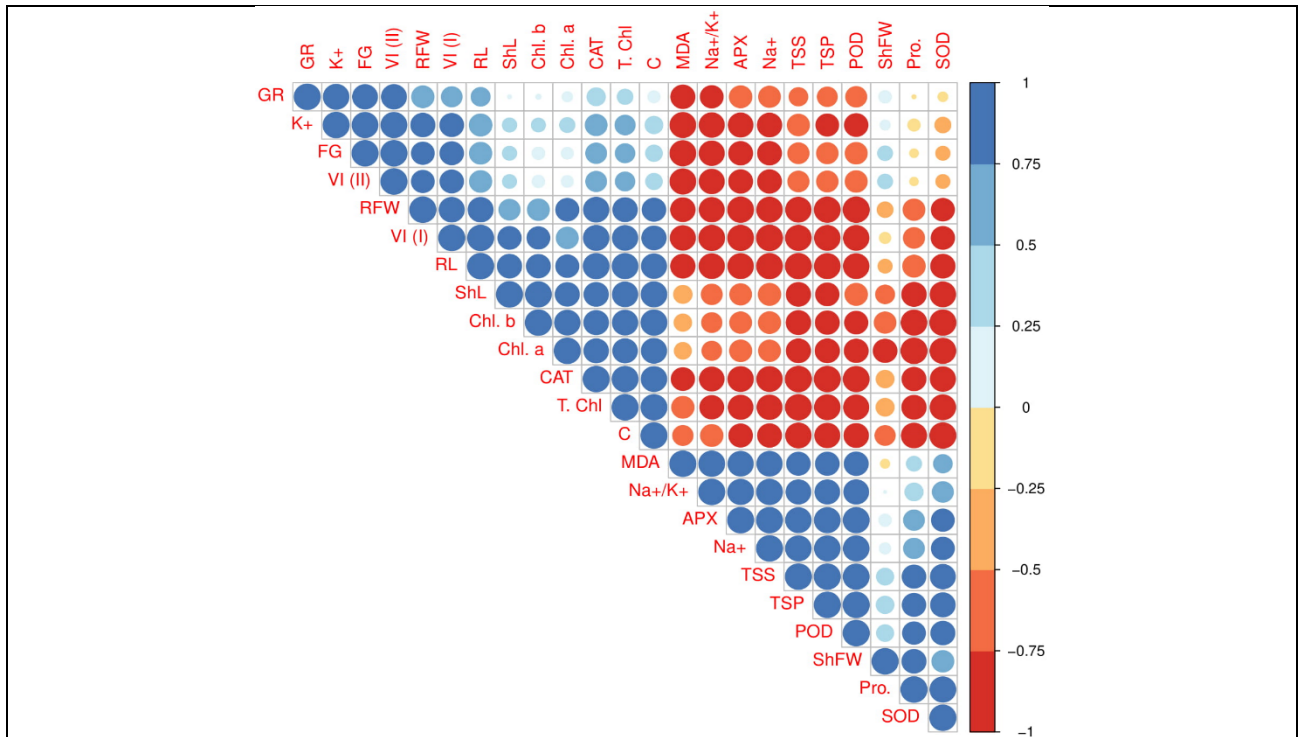

**Figure S3.** Correlation among different growth and biochemical attributes of rapeseed cultivars. FG: final germination %; GR: germination rate; VI (I): vigor index I; VI (II): vigor index II; SL: shoot length; RL: root length; ShFW: shoot fresh weight; RFW: fresh root weight; Chl. a: chlorophyll a; Chl. b: chlorophyll b; T. Chl: total chlorophyll; C: carotenoid content; TSS: total soluble sugar; TSP: total soluble protein; pro.: proline %; MDA: malondialdehyde content; Na<sup>+</sup>: sodium ions; K<sup>+</sup>: potassium ions; SOD: superoxidase activity; POD: peroxidase activity; APX: ascorbate peroxidase activity, and CAT: catalase activity.

**Table S2.** Metabolites differentially accumulated in Yangyou 9 and Zhongshuang 11 seeds upon salt stress (150 mM NaCl).

| Metabolites                   | Tolerant cultivar<br>NaClvs.CK (12 h) |         | Sensitive cultivar<br>NaClvs.CK (12 h) |         | Tolerant cultivar<br>NaClvs.CK (24 h) |         | Sensitive cultivar<br>NaClvs.CK (24 h) |         |
|-------------------------------|---------------------------------------|---------|----------------------------------------|---------|---------------------------------------|---------|----------------------------------------|---------|
|                               | FC                                    | P-value | FC                                     | P-value | FC                                    | P-value | FC                                     | P-value |
| <b>Fatty acid</b>             |                                       |         |                                        |         |                                       |         |                                        |         |
| MAG (18:3)                    | 1.47                                  | 0.000   | 1.05                                   | 0.029   | 1.07                                  | 0.001   | 1.07                                   | 0.000   |
| MAG (18:2)                    | 1.07                                  | 0.000   | 0.82                                   | 0.000   | 0.76                                  | 0.000   | 0.87                                   | 0.000   |
| MGMG (18:2)                   | 0.49                                  | 0.000   | 0.49                                   | 0.000   | 0.42                                  | 0.000   | 0.50                                   | 0.000   |
| DGMG (18:1)                   | 0.80                                  | 0.000   | 0.90                                   | 0.000   | 0.66                                  | 0.000   | 0.80                                   | 0.000   |
| DGMG (18:2)                   | 0.90                                  | 0.000   | 0.92                                   | 0.002   | 0.86                                  | 0.000   | 0.86                                   | 0.001   |
| LPE (18:2)                    | 0.91                                  | 0.000   | 0.84                                   | 0.000   | 1.04                                  | 0.011   | 0.92                                   | 0.001   |
| LysoPE 18:2                   | 0.73                                  | 0.000   | 0.96                                   | 0.020   | 0.59                                  | 0.000   | 1.52                                   | 0.000   |
| $\alpha$ -Linolenic acid      | 0.89                                  | 0.000   | 0.73                                   | 0.000   | 0.94                                  | 0.000   | 0.75                                   | 0.000   |
| Punicic acid                  | 0.89                                  | 0.001   | 0.85                                   | 0.000   | 0.96                                  | 0.004   | 0.80                                   | 0.000   |
| Tianshic acid                 | 0.94                                  | 0.008   | 1.15                                   | 0.000   | 0.87                                  | 0.002   | 0.68                                   | 0.000   |
| Cholesterol                   | 1.12                                  | 0.000   | 0.91                                   | 0.000   | 0.82                                  | 0.000   | 0.90                                   | 0.001   |
| Linolenic acid                | 0.89                                  | 0.000   | 0.93                                   | 0.000   | 1.22                                  | 0.000   | 0.85                                   | 0.002   |
| 14,15-Dehydrocrepenynic acid  | 0.94                                  | 0.014   | 1.10                                   | 0.000   | 1.09                                  | 0.000   | 0.76                                   | 0.000   |
| sn-Glycero-3-phosphocholine   | 0.78                                  | 0.000   | 0.78                                   | 0.000   | 0.79                                  | 0.000   | 0.77                                   | 0.000   |
| <b>Amino acid</b>             |                                       |         |                                        |         |                                       |         |                                        |         |
| L-Alanine                     | 0.80                                  | 0.000   | 0.68                                   | 0.000   | 0.76                                  | 0.002   | 0.77                                   | 0.000   |
| L-Serine                      | 0.92                                  | 0.001   | 0.89                                   | 0.002   | 0.78                                  | 0.012   | 0.77                                   | 0.000   |
| L-Valine                      | 0.90                                  | 0.003   | 0.80                                   | 0.003   | 0.83                                  | 0.000   | 0.95                                   | 0.009   |
| L-Threonine                   | 0.85                                  | 0.000   | 0.88                                   | 0.011   | 0.74                                  | 0.000   | 0.80                                   | 0.001   |
| L-Leucine                     | 0.91                                  | 0.004   | 0.86                                   | 0.001   | 0.79                                  | 0.000   | 0.92                                   | 0.012   |
| L-Isoleucine                  | 0.90                                  | 0.002   | 0.90                                   | 0.003   | 0.80                                  | 0.000   | 0.92                                   | 0.005   |
| L-Aspartic acid               | 1.17                                  | 0.010   | 0.93                                   | 0.049   | 0.80                                  | 0.010   | 0.91                                   | 0.003   |
| L-Lysine                      | 0.93                                  | 0.011   | 0.94                                   | 0.001   | 0.76                                  | 0.000   | 0.85                                   | 0.002   |
| L-Glutamic acid               | 0.88                                  | 0.006   | 0.84                                   | 0.004   | 0.91                                  | 0.007   | 0.85                                   | 0.000   |
| L-Methionine                  | 0.91                                  | 0.032   | 0.82                                   | 0.003   | 0.87                                  | 0.000   | 0.81                                   | 0.000   |
| L-Histidine                   | 1.43                                  | 0.000   | 1.37                                   | 0.000   | 1.08                                  | 0.000   | 1.06                                   | 0.012   |
| L-Phenylalanine               | 0.91                                  | 0.005   | 0.85                                   | 0.001   | 0.94                                  | 0.009   | 0.88                                   | 0.003   |
| L-Arginine                    | 1.74                                  | 0.000   | 1.13                                   | 0.001   | 1.38                                  | 0.001   | 1.15                                   | 0.000   |
| L-Tyrosine                    | 0.87                                  | 0.001   | 0.79                                   | 0.012   | 0.78                                  | 0.003   | 0.92                                   | 0.008   |
| L-Tryptophan                  | 0.93                                  | 0.012   | 0.88                                   | 0.001   | 0.69                                  | 0.002   | 0.85                                   | 0.014   |
| L-Tryptamine                  | 0.94                                  | 0.002   | 1.05                                   | 0.001   | 0.75                                  | 0.005   | 0.92                                   | 0.002   |
| L-Asparagine                  | 1.11                                  | 0.001   | 0.87                                   | 0.001   | 0.90                                  | 0.002   | 0.92                                   | 0.004   |
| L-Tyramine                    | 0.90                                  | 0.013   | 1.04                                   | 0.002   | 0.82                                  | 0.001   | 1.13                                   | 0.000   |
| L-Proline                     | 1.11                                  | 0.000   | 1.07                                   | 0.000   | 1.11                                  | 0.000   | 1.17                                   | 0.000   |
| L-Methionine sulfone          | 0.88                                  | 0.000   | 1.00                                   | 0.033   | 0.79                                  | 0.000   | 0.96                                   | 0.000   |
| Ornithine                     | 1.10                                  | 0.000   | 0.97                                   | 0.038   | 0.89                                  | 0.000   | 0.91                                   | 0.001   |
| beta-Homothreonine            | 1.12                                  | 0.006   | 0.89                                   | 0.016   | 0.70                                  | 0.000   | 0.86                                   | 0.000   |
| Cysteine                      | 0.72                                  | 0.000   | 1.14                                   | 0.007   | 0.91                                  | 0.000   | 0.66                                   | 0.000   |
| 5-Hydroxytryptophan           | 1.04                                  | 0.025   | 0.91                                   | 0.000   | 0.85                                  | 0.000   | 0.93                                   | 0.000   |
| Glutathione (oxidized form)   | 1.17                                  | 0.000   | 0.76                                   | 0.000   | 1.09                                  | 0.000   | 0.81                                   | 0.000   |
| Saccharopine                  | 0.99                                  | 0.713   | 0.97                                   | 0.473   | 1.09                                  | 0.017   | 1.40                                   | 0.001   |
| Leucine derivative            | 1.17                                  | 0.007   | 1.20                                   | 0.000   | 1.07                                  | 0.000   | 1.28                                   | 0.000   |
| Kynurenine                    | 1.13                                  | 0.004   | 1.33                                   | 0.001   | 1.29                                  | 0.000   | 1.43                                   | 0.000   |
| N-p-Coumaroyltryptamine       | 1.12                                  | 0.010   | 1.32                                   | 0.001   | 1.09                                  | 0.014   | 1.21                                   | 0.000   |
| 3,4-Dihydroxy-L-phenylalanine | 0.80                                  | 0.000   | 0.87                                   | 0.263   | 1.42                                  | 0.000   | 1.10                                   | 0.000   |
| 4-Guanidinobutanoate          | 0.96                                  | 0.000   | 1.04                                   | 0.000   | 0.88                                  | 0.000   | 0.92                                   | 0.000   |
| Xanthurenic acid              | 0.94                                  | 0.179   | 1.15                                   | 0.000   | 1.07                                  | 0.000   | 0.77                                   | 0.000   |
| Kynurenic acid                | 1.02                                  | 0.000   | 1.06                                   | 0.001   | 0.88                                  | 0.000   | 0.90                                   | 0.000   |
| Serotonin                     | 0.69                                  | 0.000   | 1.15                                   | 0.000   | 0.83                                  | 0.000   | 1.13                                   | 0.000   |
| Xanthurenic acid O-hexoside   | 1.02                                  | 0.000   | 0.92                                   | 0.000   | 0.90                                  | 0.000   | 1.02                                   | 0.000   |
| N-Benzoylserotonin            | 1.01                                  | 0.001   | 0.94                                   | 0.000   | 0.80                                  | 0.000   | 1.14                                   | 0.000   |
| N-p-Coumaroylserotonin        | 1.12                                  | 0.000   | 0.93                                   | 0.000   | 0.76                                  | 0.000   | 0.94                                   | 0.000   |
| N-Feruloylserotonin           | 1.11                                  | 0.000   | 0.91                                   | 0.000   | 0.99                                  | 0.005   | 0.99                                   | 0.010   |
| N-Acetyl-L-leucine            | 1.02                                  | 0.000   | 1.03                                   | 0.000   | 0.98                                  | 0.000   | 0.98                                   | 0.000   |
| N-Acetyltryptamine            | 1.12                                  | 0.000   | 1.14                                   | 0.000   | 1.05                                  | 0.005   | 0.78                                   | 0.000   |

(continued on next page)

**Table S2.** (continued)

| Metabolites                            | Tolerant cultivar<br>NaCl vs. CK (12 h) |         | Sensitive cultivar<br>NaCl vs. CK (12 h) |         | Tolerant cultivar<br>NaCl vs. CK (24 h) |         | Sensitive cultivar<br>NaCl vs. CK (24 h) |         |
|----------------------------------------|-----------------------------------------|---------|------------------------------------------|---------|-----------------------------------------|---------|------------------------------------------|---------|
|                                        | FC                                      | P-value | FC                                       | P-value | FC                                      | P-value | FC                                       | P-value |
| <b>Nucleic acid</b>                    |                                         |         |                                          |         |                                         |         |                                          |         |
| Guanine                                | 0.87                                    | 0.000   | 0.84                                     | 0.001   | 0.92                                    | 0.001   | 0.84                                     | 0.000   |
| Xanthine                               | 0.81                                    | 0.000   | 0.67                                     | 0.000   | 0.95                                    | 0.029   | 0.79                                     | 0.000   |
| Uridine                                | 1.34                                    | 0.001   | 1.26                                     | 0.002   | 1.49                                    | 0.000   | 1.37                                     | 0.011   |
| Inosine                                | 1.08                                    | 0.002   | 1.10                                     | 0.002   | 1.30                                    | 0.000   | 1.14                                     | 0.030   |
| Xanthosine                             | 0.94                                    | 0.029   | 0.88                                     | 0.042   | 1.56                                    | 0.000   | 0.86                                     | 0.005   |
| Uracil                                 | 1.24                                    | 0.001   | 1.11                                     | 0.004   | 0.84                                    | 0.001   | 1.34                                     | 0.000   |
| Adenine                                | 0.92                                    | 0.001   | 0.80                                     | 0.000   | 0.93                                    | 0.006   | 0.71                                     | 0.000   |
| Cytidine                               | 1.08                                    | 0.016   | 1.63                                     | 0.000   | 1.08                                    | 0.030   | 1.08                                     | 0.003   |
| Crotonoside                            | 1.05                                    | 0.042   | 0.85                                     | 0.000   | 1.57                                    | 0.000   | 0.87                                     | 0.033   |
| Guanosine                              | 1.06                                    | 0.010   | 0.88                                     | 0.004   | 1.88                                    | 0.000   | 0.88                                     | 0.012   |
| Adenosine                              | 1.23                                    | 0.000   | 1.23                                     | 0.004   | 1.24                                    | 0.000   | 1.04                                     | 0.000   |
| N2, N2-Dimethylguanosine               | 1.09                                    | 0.030   | 0.94                                     | 0.015   | 1.16                                    | 0.017   | 0.98                                     | 0.051   |
| trans-zeatin N-glucoside               | 1.04                                    | 0.042   | 0.96                                     | 0.001   | 0.96                                    | 0.000   | 0.93                                     | 0.001   |
| Inosine 5'-monophosphate               | 0.84                                    | 0.000   | 0.55                                     | 0.000   | 1.11                                    | 0.011   | 0.69                                     | 0.001   |
| Succinyl adenosine                     | 0.98                                    | 0.027   | 0.95                                     | 0.038   | 0.90                                    | 0.018   | 1.18                                     | 0.001   |
| Adenosine O-ribose                     | 0.95                                    | 0.000   | 0.97                                     | 0.043   | 0.97                                    | 0.004   | 1.08                                     | 0.023   |
| N-(9H-Purin-6-ylcarbonyl) threonine    | 1.07                                    | 0.002   | 0.91                                     | 0.019   | 1.04                                    | 0.006   | 1.02                                     | 0.055   |
| 2'-Deoxyadenosine                      | 1.07                                    | 0.004   | 1.04                                     | 0.017   | 1.04                                    | 0.034   | 0.88                                     | 0.003   |
| 2'-Deoxyinosine-5'-monophosphate       | 0.29                                    | 0.000   | 0.22                                     | 0.000   | 0.26                                    | 0.000   | 0.21                                     | 0.000   |
| Adenosine 3'-monophosphate             | 0.86                                    | 0.000   | 0.56                                     | 0.000   | 1.01                                    | 0.358   | 0.57                                     | 0.006   |
| 5'-Deoxy-5'-(methylthio) adenosine     | 0.69                                    | 0.000   | 0.79                                     | 0.001   | 0.54                                    | 0.000   | 0.77                                     | 0.000   |
| <b>Polyphenols</b>                     |                                         |         |                                          |         |                                         |         |                                          |         |
| Quinic acid                            | 1.44                                    | 0.000   | 1.21                                     | 0.001   | 1.31                                    | 0.000   | 1.28                                     | 0.000   |
| Sinapic acid                           | 1.48                                    | 0.000   | 1.23                                     | 0.001   | 1.77                                    | 0.000   | 1.26                                     | 0.000   |
| Ferulic acid                           | 1.16                                    | 0.002   | 1.06                                     | 0.039   | 1.04                                    | 0.015   | 1.10                                     | 0.036   |
| Catechin                               | 1.16                                    | 0.005   | 0.86                                     | 0.036   | 1.06                                    | 0.031   | 0.75                                     | 0.001   |
| Chlorogenic acid                       | 1.11                                    | 0.003   | 0.80                                     | 0.001   | 0.97                                    | 0.095   | 1.08                                     | 0.004   |
| N-Feruloylserotonin                    | 1.37                                    | 0.000   | 0.78                                     | 0.000   | 1.08                                    | 0.000   | 0.89                                     | 0.003   |
| Ferulic acid O-hexoside                | 1.08                                    | 0.002   | 1.04                                     | 0.017   | 0.94                                    | 0.003   | 0.94                                     | 0.025   |
| Coniferyl aldehyde                     | 1.20                                    | 0.000   | 1.07                                     | 0.039   | 0.86                                    | 0.003   | 1.13                                     | 0.015   |
| Caffeic acid                           | 0.95                                    | 0.005   | 1.13                                     | 0.011   | 0.87                                    | 0.000   | 0.91                                     | 0.003   |
| Sinapoyl quinic acid                   | 0.96                                    | 0.087   | 0.95                                     | 0.049   | 0.97                                    | 0.112   | 0.93                                     | 0.022   |
| p-Coumaric acid                        | 0.85                                    | 0.006   | 0.91                                     | 0.008   | 0.87                                    | 0.000   | 0.91                                     | 0.016   |
| Benzamidine                            | 0.95                                    | 0.025   | 0.69                                     | 0.000   | 0.78                                    | 0.002   | 1.06                                     | 0.000   |
| Caffeoyl shikimic acid                 | 0.95                                    | 0.016   | 0.88                                     | 0.012   | 0.98                                    | 0.091   | 0.95                                     | 0.007   |
| 4-O-p-Coumaroylquinic acid             | 0.97                                    | 0.246   | 0.91                                     | 0.001   | 0.78                                    | 0.006   | 0.93                                     | 0.031   |
| Sinapoyl O-hexoside                    | 0.84                                    | 0.001   | 0.91                                     | 0.002   | 0.85                                    | 0.004   | 0.92                                     | 0.040   |
| Fer quinic acid                        | 0.92                                    | 0.000   | 0.86                                     | 0.000   | 0.93                                    | 0.000   | 0.92                                     | 0.000   |
| <b>Phenol amine</b>                    |                                         |         |                                          |         |                                         |         |                                          |         |
| N-Caffeoylputrescine                   | 1.13                                    | 0.000   | 1.09                                     | 0.000   | 1.18                                    | 0.000   | 1.14                                     | 0.000   |
| N-p-Coumaroylputrescine                | 1.28                                    | 0.001   | 1.11                                     | 0.002   | 1.15                                    | 0.000   | 1.16                                     | 0.000   |
| N', N''-p-Coumaroyl Feruloylspermidine | 1.21                                    | 0.000   | 1.12                                     | 0.008   | 1.15                                    | 0.002   | 1.10                                     | 0.040   |
| p-Coumaroyl-2-hydroxyputrescine        | 1.09                                    | 0.022   | 1.10                                     | 0.000   | 0.94                                    | 0.005   | 0.94                                     | 0.005   |
| N-p-Coumaroylagmatine                  | 0.74                                    | 0.000   | 0.83                                     | 0.000   | 0.85                                    | 0.000   | 0.91                                     | 0.029   |
| N-Feruloylagmatine                     | 0.83                                    | 0.014   | 0.65                                     | 0.000   | 0.79                                    | 0.000   | 0.63                                     | 0.000   |
| N', N''-Di-p-Coumaroylspermidine       | 0.87                                    | 0.001   | 1.14                                     | 0.000   | 0.81                                    | 0.000   | 1.09                                     | 0.000   |
| N-p-Coumaroylputrescine derivative     | 0.88                                    | 0.001   | 0.91                                     | 0.003   | 0.79                                    | 0.000   | 0.77                                     | 0.000   |
| N-Feruloyl Cadaverine                  | 0.88                                    | 0.000   | 0.83                                     | 0.000   | 0.78                                    | 0.000   | 0.72                                     | 0.000   |
| <b>Polyamine</b>                       |                                         |         |                                          |         |                                         |         |                                          |         |
| Spermine                               | 1.20                                    | 0.000   | 1.55                                     | 0.000   | 1.23                                    | 0.001   | 1.25                                     | 0.000   |
| Feruloyl putrescine O-hexoside         | 0.81                                    | 0.002   | 0.90                                     | 0.005   | 0.72                                    | 0.000   | 0.86                                     | 0.001   |
| <b>Alkaloid</b>                        |                                         |         |                                          |         |                                         |         |                                          |         |
| Trigonelline                           | 1.26                                    | 0.000   | 1.05                                     | 0.036   | 1.15                                    | 0.002   | 0.89                                     | 0.013   |
| Betaine                                | 1.10                                    | 0.000   | 0.85                                     | 0.044   | 1.05                                    | 0.002   | 0.90                                     | 0.011   |

(continued on next page)

**Table S2.** (continued)

| Metabolites                                       | Tolerant cultivar<br>NaCl vs. CK (12 h) |         | Sensitive cultivar<br>NaCl vs. CK (12 h) |         | Tolerant cultivar<br>NaCl vs. CK (24 h) |         | Sensitive cultivar<br>NaCl vs. CK (24 h) |         |
|---------------------------------------------------|-----------------------------------------|---------|------------------------------------------|---------|-----------------------------------------|---------|------------------------------------------|---------|
|                                                   | FC                                      | P-value | FC                                       | P-value | FC                                      | P-value | FC                                       | P-value |
| <b>Vitamins</b>                                   |                                         |         |                                          |         |                                         |         |                                          |         |
| Vitamin B2                                        | 1.07                                    | 0.005   | 1.23                                     | 0.000   | 1.20                                    | 0.000   | 1.06                                     | 0.049   |
| Pyridoxine O-glucoside                            | 1.28                                    | 0.002   | 1.08                                     | 0.000   | 1.18                                    | 0.002   | 0.80                                     | 0.002   |
| Thiamin                                           | 1.21                                    | 0.000   | 1.04                                     | 0.008   | 1.09                                    | 0.001   | 1.07                                     | 0.000   |
| 4-Pyridoxic acid O-hexoside                       | 1.18                                    | 0.002   | 0.86                                     | 0.000   | 0.91                                    | 0.016   | 1.25                                     | 0.001   |
| 4-Methyl-5-thiazoleethanol                        | 1.26                                    | 0.000   | 1.02                                     | 0.051   | 1.23                                    | 0.000   | 1.43                                     | 0.000   |
| Carbachol                                         | 1.05                                    | 0.001   | 1.04                                     | 0.003   | 1.24                                    | 0.000   | 0.79                                     | 0.000   |
| Nicotinic acid                                    | 1.10                                    | 0.000   | 1.03                                     | 0.015   | 1.06                                    | 0.000   | 1.16                                     | 0.002   |
| 1-Methylnicotinamide                              | 1.07                                    | 0.002   | 0.88                                     | 0.000   | 1.04                                    | 0.000   | 0.95                                     | 0.012   |
| Pyridoxine                                        | 1.07                                    | 0.009   | 0.86                                     | 0.000   | 0.90                                    | 0.000   | 0.92                                     | 0.000   |
| Niacinamide                                       | 0.88                                    | 0.026   | 0.53                                     | 0.000   | 1.15                                    | 0.002   | 0.75                                     | 0.000   |
| Nicotinoylcholine                                 | 1.09                                    | 0.004   | 0.94                                     | 0.054   | 1.07                                    | 0.002   | 0.89                                     | 0.001   |
| Choline                                           | 1.23                                    | 0.001   | 1.05                                     | 0.000   | 1.17                                    | 0.005   | 1.48                                     | 0.000   |
| Sinapoylcholine                                   | 1.10                                    | 0.000   | 0.92                                     | 0.000   | 1.06                                    | 0.000   | 0.94                                     | 0.020   |
| <b>Flavonoid</b>                                  |                                         |         |                                          |         |                                         |         |                                          |         |
| Apigenin C-pentoside                              | 1.22                                    | 0.000   | 1.09                                     | 0.002   | 0.75                                    | 0.000   | 0.92                                     | 0.040   |
| Apigenin 6-C-glucoside                            | 0.82                                    | 0.002   | 0.65                                     | 0.001   | 0.90                                    | 0.035   | 0.73                                     | 0.001   |
| Apigenin 7-O-glucoside                            | 1.09                                    | 0.000   | 1.24                                     | 0.002   | 1.20                                    | 0.000   | 1.31                                     | 0.001   |
| C-pentosyl-apigenin O-hexoside                    | 1.13                                    | 0.001   | 1.18                                     | 0.001   | 1.10                                    | 0.001   | 1.06                                     | 0.014   |
| C-hexosyl-luteolin O-hexoside                     | 1.32                                    | 0.001   | 1.23                                     | 0.015   | 1.13                                    | 0.031   | 1.23                                     | 0.000   |
| C-hexosyl-luteolin O-p-coumaroylhexoside          | 1.32                                    | 0.000   | 1.17                                     | 0.000   | 1.25                                    | 0.000   | 1.09                                     | 0.004   |
| Chrysoeriol                                       | 1.30                                    | 0.002   | 1.10                                     | 0.169   | 1.39                                    | 0.000   | 1.32                                     | 0.000   |
| Chrysoeriol C-hexoside                            | 0.96                                    | 0.051   | 0.88                                     | 0.040   | 0.85                                    | 0.014   | 0.79                                     | 0.000   |
| Chrysoeriol O-malonylhexoside                     | 1.19                                    | 0.001   | 0.97                                     | 0.458   | 1.11                                    | 0.015   | 0.97                                     | 0.403   |
| Chrysoeriol 5-O-hexoside                          | 1.21                                    | 0.020   | 1.06                                     | 0.015   | 0.98                                    | 0.036   | 0.95                                     | 0.013   |
| Chrysoeriol 7-O-hexoside                          | 1.08                                    | 0.027   | 1.11                                     | 0.000   | 1.03                                    | 0.001   | 1.03                                     | 0.022   |
| Chrysoeriol 7-O-rutinoside                        | 1.05                                    | 0.017   | 1.10                                     | 0.000   | 1.23                                    | 0.000   | 1.08                                     | 0.008   |
| Tricin                                            | 1.19                                    | 0.013   | 0.70                                     | 0.000   | 1.09                                    | 0.001   | 0.81                                     | 0.000   |
| Tricin O-hexosyl-O-hexoside                       | 1.06                                    | 0.056   | 1.09                                     | 0.024   | 1.06                                    | 0.048   | 1.05                                     | 0.021   |
| Tricin 4'-O-(syringyl alcohol) ether O-hexoside   | 1.01                                    | 0.765   | 0.73                                     | 0.000   | 1.18                                    | 0.000   | 1.22                                     | 0.000   |
| Tricin 4'-O-(syringyl alcohol) ether 5-O-hexoside | 1.17                                    | 0.004   | 1.62                                     | 0.000   | 1.17                                    | 0.011   | 1.50                                     | 0.000   |
| Tricin 5-O-hexosyl-O-hexoside                     | 1.15                                    | 0.003   | 1.23                                     | 0.005   | 0.96                                    | 0.055   | 1.01                                     | 0.284   |
| Tricin 5-O-hexoside                               | 1.06                                    | 0.098   | 1.02                                     | 0.186   | 1.02                                    | 0.687   | 1.02                                     | 0.048   |
| Tricin 7-O-hexoside                               | 0.98                                    | 0.048   | 0.93                                     | 0.000   | 0.88                                    | 0.007   | 0.85                                     | 0.002   |
| Phellodensin F                                    | 0.91                                    | 0.004   | 0.92                                     | 0.022   | 0.60                                    | 0.000   | 0.76                                     | 0.002   |
| Luteolin 6-C-glucoside                            | 0.62                                    | 0.001   | 0.87                                     | 0.032   | 0.56                                    | 0.001   | 0.88                                     | 0.032   |
| Luteolin 7-O-glucoside                            | 1.13                                    | 0.010   | 1.20                                     | 0.027   | 0.85                                    | 0.041   | 1.30                                     | 0.000   |
| C-pentosyl-apegnin O-feruloylhexoside             | 0.98                                    | 0.366   | 0.93                                     | 0.017   | 0.92                                    | 0.009   | 0.85                                     | 0.000   |
| Glycitin                                          | 0.92                                    | 0.036   | 1.41                                     | 0.000   | 0.87                                    | 0.022   | 1.16                                     | 0.003   |
| methylLuteolin C-hexoside                         | 1.19                                    | 0.000   | 1.27                                     | 0.000   | 1.06                                    | 0.023   | 1.05                                     | 0.025   |
| Selgin 5-O-hexoside                               | 1.10                                    | 0.021   | 0.93                                     | 0.000   | 1.19                                    | 0.000   | 0.92                                     | 0.002   |
| Cyanidin 3,5-di-O-hexoside                        | 1.03                                    | 0.033   | 0.94                                     | 0.007   | 1.16                                    | 0.053   | 0.89                                     | 0.026   |
| Cyanidin 3-O-glucoside                            | 0.85                                    | 0.000   | 0.93                                     | 0.000   | 0.87                                    | 0.000   | 0.78                                     | 0.000   |
| Delphinidin O-rutinoside                          | 1.05                                    | 0.054   | 0.72                                     | 0.000   | 0.74                                    | 0.000   | 0.90                                     | 0.000   |
| <b>Sugars</b>                                     |                                         |         |                                          |         |                                         |         |                                          |         |
| Fructose 1, 6-diphosphate                         | 1.20                                    | 0.001   | 0.74                                     | 0.000   | 1.16                                    | 0.006   | 1.13                                     | 0.000   |
| Sucrose                                           | 1.05                                    | 0.009   | 0.93                                     | 0.002   | 1.06                                    | 0.001   | 1.05                                     | 0.032   |
| D- (+)-Maltose                                    | 2.56                                    | 0.000   | 2.58                                     | 0.000   | 2.59                                    | 0.000   | 2.40                                     | 0.000   |
| $\alpha$ -Lactose                                 | 1.08                                    | 0.003   | 0.90                                     | 0.000   | 1.06                                    | 0.001   | 0.90                                     | 0.000   |
| $\alpha$ -L-Rhamnose                              | 0.90                                    | 0.011   | 0.94                                     | 0.001   | 0.92                                    | 0.019   | 0.96                                     | 0.002   |
| <b>Terpene</b>                                    |                                         |         |                                          |         |                                         |         |                                          |         |
| Polygodial                                        | 1.33                                    | 0.001   | 0.87                                     | 0.003   | 1.10                                    | 0.039   | 0.77                                     | 0.003   |
| Diosgenin                                         | 0.91                                    | 0.011   | 1.10                                     | 0.020   | 1.13                                    | 0.027   | 1.12                                     | 0.014   |

(continued on next page)

**Table S2.** (continued)

| Metabolites                                                    | Tolerant cultivar<br>NaCl vs. CK (12 h) |         | Sensitive cultivar<br>NaCl vs. CK (12 h) |         | Tolerant cultivar<br>NaCl vs. CK (24 h) |         | Sensitive cultivar<br>NaCl vs. CK (24 h) |         |
|----------------------------------------------------------------|-----------------------------------------|---------|------------------------------------------|---------|-----------------------------------------|---------|------------------------------------------|---------|
|                                                                | FC                                      | P-value | FC                                       | P-value | FC                                      | P-value | FC                                       | P-value |
| <b>Hormones</b>                                                |                                         |         |                                          |         |                                         |         |                                          |         |
| Gibberellin A14                                                | 1.07                                    | 0.003   | 1.24                                     | 0.000   | 1.20                                    | 0.000   | 0.66                                     | 0.000   |
| IAA                                                            | 0.89                                    | 0.000   | 0.97                                     | 0.029   | 0.96                                    | 0.251   | 1.02                                     | 0.048   |
| IAA-Asp                                                        | 1.46                                    | 0.000   | 1.38                                     | 0.000   | 2.44                                    | 0.000   | 1.72                                     | 0.000   |
| IAA-Glu                                                        | 1.13                                    | 0.001   | 0.91                                     | 0.012   | 1.07                                    | 0.004   | 1.26                                     | 0.007   |
| Indole                                                         | 1.26                                    | 0.000   | 1.16                                     | 0.000   | 1.80                                    | 0.000   | 1.19                                     | 0.000   |
| Indole-3-carboxylic acid                                       | 0.84                                    | 0.000   | 1.06                                     | 0.014   | 0.91                                    | 0.000   | 1.08                                     | 0.001   |
| Indole-3-carboxaldehyde                                        | 1.19                                    | 0.000   | 1.22                                     | 0.004   | 1.24                                    | 0.004   | 1.16                                     | 0.001   |
| Indoline                                                       | 0.98                                    | 0.006   | 0.91                                     | 0.000   | 0.84                                    | 0.001   | 0.95                                     | 0.012   |
| Melatonin                                                      | 1.19                                    | 0.000   | 0.92                                     | 0.010   | 1.23                                    | 0.000   | 0.84                                     | 0.000   |
| Methoxy indoleacetic acid                                      | 0.96                                    | 0.018   | 1.03                                     | 0.037   | 0.98                                    | 0.287   | 1.08                                     | 0.004   |
| <b>Others</b>                                                  |                                         |         |                                          |         |                                         |         |                                          |         |
| Tuberonic acid hexoside                                        | 0.84                                    | 0.003   | 0.95                                     | 0.009   | 0.89                                    | 0.016   | 0.88                                     | 0.001   |
| DIMBOA glucoside                                               | 1.11                                    | 0.000   | 0.66                                     | 0.000   | 1.15                                    | 0.000   | 0.91                                     | 0.000   |
| Nicotianamine                                                  | 1.05                                    | 0.004   | 0.89                                     | 0.014   | 1.10                                    | 0.001   | 1.29                                     | 0.000   |
| Roseoside                                                      | 1.06                                    | 0.000   | 1.06                                     | 0.032   | 0.93                                    | 0.033   | 0.93                                     | 0.009   |
| Manglieside E                                                  | 1.06                                    | 0.040   | 0.58                                     | 0.000   | 1.15                                    | 0.002   | 1.11                                     | 0.007   |
| O-Acetyl-L-serine                                              | 0.92                                    | 0.021   | 0.91                                     | 0.028   | 0.95                                    | 0.012   | 0.95                                     | 0.027   |
| DL- $\alpha$ , $\epsilon$ -silon-Diaminopimelic acid           | 0.94                                    | 0.002   | 1.03                                     | 0.495   | 0.84                                    | 0.000   | 1.02                                     | 0.020   |
| Pipecolinic acid                                               | 0.97                                    | 0.011   | 0.94                                     | 0.009   | 0.87                                    | 0.005   | 0.89                                     | 0.010   |
| p-Nitroaniline                                                 | 1.22                                    | 0.001   | 1.34                                     | 0.001   | 1.12                                    | 0.001   | 1.17                                     | 0.004   |
| 2-(5-hydroxy-1H-indol-3-yl) acetic acid                        | 1.19                                    | 0.004   | 1.13                                     | 0.000   | 0.91                                    | 0.012   | 1.15                                     | 0.003   |
| Carnitine                                                      | 0.82                                    | 0.002   | 0.87                                     | 0.018   | 0.73                                    | 0.000   | 0.82                                     | 0.009   |
| N-acetylneuraminic acid                                        | 1.18                                    | 0.000   | 0.91                                     | 0.008   | 0.78                                    | 0.000   | 0.83                                     | 0.001   |
| Glucosamine                                                    | 0.78                                    | 0.001   | 0.72                                     | 0.000   | 0.85                                    | 0.001   | 0.74                                     | 0.003   |
| 1-methyladenosine                                              | 0.72                                    | 0.000   | 1.32                                     | 0.000   | 1.91                                    | 0.000   | 1.22                                     | 0.000   |
| 1-methylguanosine                                              | 0.95                                    | 0.007   | 0.88                                     | 0.000   | 0.90                                    | 0.006   | 0.89                                     | 0.000   |
| 5-methylcytidine                                               | 0.80                                    | 0.005   | 0.55                                     | 0.000   | 0.68                                    | 0.000   | 0.45                                     | 0.000   |
| 2'-O-methyladenosine                                           | 1.12                                    | 0.055   | 1.18                                     | 0.000   | 1.43                                    | 0.006   | 1.08                                     | 0.013   |
| 2'-O-methylguanosine                                           | 1.05                                    | 0.003   | 0.93                                     | 0.000   | 1.32                                    | 0.000   | 1.17                                     | 0.000   |
| N4-Acetylsulfamethoxazole                                      | 0.88                                    | 0.000   | 0.89                                     | 0.001   | 0.89                                    | 0.001   | 0.73                                     | 0.000   |
| Pinoresinol 4-O-glucoside                                      | 1.27                                    | 0.003   | 0.77                                     | 0.000   | 1.39                                    | 0.000   | 0.74                                     | 0.000   |
| Isobornyl methacrylate                                         | 1.18                                    | 0.001   | 0.92                                     | 0.018   | 0.96                                    | 0.109   | 0.78                                     | 0.000   |
| 2-(Carboxyacetaido)benzoic acid                                | 1.35                                    | 0.000   | 1.41                                     | 0.000   | 0.75                                    | 0.000   | 0.72                                     | 0.000   |
| 1-( $\beta$ -D-Ribofuranosyl)-3-pyridiniumcarboxylate          | 0.94                                    | 0.000   | 1.02                                     | 0.012   | 0.81                                    | 0.000   | 0.89                                     | 0.001   |
| Tolycaine                                                      | 0.88                                    | 0.009   | 1.10                                     | 0.001   | 1.12                                    | 0.003   | 1.32                                     | 0.000   |
| Oleamide                                                       | 0.80                                    | 0.000   | 0.89                                     | 0.001   | 1.13                                    | 0.001   | 0.73                                     | 0.000   |
| Gelsemine                                                      | 0.87                                    | 0.000   | 0.65                                     | 0.000   | 0.58                                    | 0.000   | 0.64                                     | 0.000   |
| Golotimod                                                      | 1.35                                    | 0.000   | 1.17                                     | 0.002   | 1.16                                    | 0.000   | 1.01                                     | 0.059   |
| Citroflex 2                                                    | 0.98                                    | 0.020   | 0.72                                     | 0.000   | 0.97                                    | 0.002   | 0.66                                     | 0.000   |
| 1-[5-(2,3,4-Trihydroxybutyl)-2-pyrazinyl]-1,2,3,4-butanetetrol | 1.17                                    | 0.002   | 0.93                                     | 0.005   | 1.08                                    | 0.023   | 0.91                                     | 0.000   |
| 2-Aminoisobutyric acid                                         | 1.21                                    | 0.005   | 0.86                                     | 0.002   | 0.75                                    | 0.000   | 0.80                                     | 0.002   |
| N-Undecanoylglycine                                            | 0.95                                    | 0.001   | 0.93                                     | 0.004   | 0.96                                    | 0.027   | 0.95                                     | 0.007   |
| (9S,13S)-12-Oxophytodienoic acid                               | 1.23                                    | 0.002   | 1.05                                     | 0.000   | 1.16                                    | 0.000   | 0.84                                     | 0.029   |
| Methyl 2-[(2-methoxy-2-oxoethyl) amino] acetate                | 0.86                                    | 0.007   | 0.90                                     | 0.000   | 0.95                                    | 0.024   | 0.85                                     | 0.000   |
| N-acetyl-L-2-amino adipic acid                                 | 1.09                                    | 0.000   | 0.92                                     | 0.000   | 1.16                                    | 0.001   | 0.91                                     | 0.001   |
| Urocanic acid                                                  | 1.05                                    | 0.002   | 1.07                                     | 0.002   | 0.91                                    | 0.000   | 0.93                                     | 0.000   |
| DL-3,4-Dihydroxymandelic acid                                  | 1.07                                    | 0.000   | 1.68                                     | 0.000   | 1.06                                    | 0.008   | 1.14                                     | 0.004   |
| S-Carboxymethyl-L-cysteine                                     | 1.28                                    | 0.000   | 1.12                                     | 0.001   | 1.20                                    | 0.000   | 1.15                                     | 0.000   |
| 4-Pyridoxate                                                   | 1.18                                    | 0.000   | 1.11                                     | 0.006   | 0.93                                    | 0.000   | 1.14                                     | 0.004   |
| Kinetin                                                        | 1.31                                    | 0.000   | 0.91                                     | 0.002   | 1.06                                    | 0.001   | 1.34                                     | 0.001   |
| 8-Chlro-1-tetrahydronorharmanone                               | 1.11                                    | 0.024   | 1.17                                     | 0.020   | 1.10                                    | 0.003   | 0.89                                     | 0.006   |
| 5-Hydroxytryptophan                                            | 0.84                                    | 0.000   | 0.80                                     | 0.000   | 0.80                                    | 0.000   | 0.89                                     | 0.005   |
| 2,3-dihydroflavone                                             | 1.98                                    | 0.000   | 1.24                                     | 0.001   | 1.16                                    | 0.000   | 1.12                                     | 0.004   |
| 7-Hydroxyflavone                                               | 1.11                                    | 0.000   | 1.13                                     | 0.000   | 0.91                                    | 0.001   | 0.77                                     | 0.000   |
| Caffeoylcholine                                                | 0.88                                    | 0.038   | 1.17                                     | 0.007   | 0.84                                    | 0.008   | 1.00                                     | 0.843   |
| Sinapoyl malate                                                | 1.27                                    | 0.001   | 1.05                                     | 0.132   | 1.09                                    | 0.004   | 0.89                                     | 0.000   |

(continued on next page)



**Table S2.** (continued)

| Metabolites                                                             | Tolerant cultivar<br>NaCl vs. CK (12 h) |         | Sensitive cultivar<br>NaCl vs. CK (12 h) |         | Tolerant cultivar<br>NaCl vs. CK (24 h) |         | Sensitive cultivar<br>NaCl vs. CK (24 h) |         |
|-------------------------------------------------------------------------|-----------------------------------------|---------|------------------------------------------|---------|-----------------------------------------|---------|------------------------------------------|---------|
|                                                                         | FC                                      | P-value | FC                                       | P-value | FC                                      | P-value | FC                                       | P-value |
| Hinokinin                                                               | 0.91                                    | 0.000   | 0.69                                     | 0.000   | 1.19                                    | 0.000   | 1.26                                     | 0.000   |
| 3-Methoxy-4-hydroxybenzoic acid O-hexoside                              | 1.33                                    | 0.000   | 1.12                                     | 0.007   | 1.17                                    | 0.015   | 1.13                                     | 0.006   |
| 4-Indolecarbaldehyde                                                    | 1.17                                    | 0.000   | 1.22                                     | 0.000   | 1.63                                    | 0.000   | 1.40                                     | 0.000   |
| Phosphoric acid                                                         | 0.92                                    | 0.011   | 0.91                                     | 0.014   | 1.35                                    | 0.000   | 0.64                                     | 0.000   |
| Tributyl phosphate                                                      | 1.19                                    | 0.003   | 1.32                                     | 0.000   | 1.45                                    | 0.000   | 1.19                                     | 0.014   |
| ANETHOLE                                                                | 1.14                                    | 0.048   | 0.90                                     | 0.039   | 1.31                                    | 0.000   | 1.08                                     | 0.094   |
| 4-hydroxybenzoic acid O-hexoside                                        | 1.17                                    | 0.001   | 0.88                                     | 0.004   | 1.10                                    | 0.002   | 0.93                                     | 0.001   |
| Inosine                                                                 | 0.94                                    | 0.000   | 1.34                                     | 0.000   | 1.19                                    | 0.000   | 1.13                                     | 0.000   |
| Etamiphylline                                                           | 0.89                                    | 0.000   | 0.90                                     | 0.000   | 1.45                                    | 0.000   | 0.82                                     | 0.001   |
| Gingerol                                                                | 0.79                                    | 0.000   | 1.02                                     | 0.291   | 1.08                                    | 0.000   | 0.91                                     | 0.000   |
| Guanosine 5'-monophosphate                                              | 1.03                                    | 0.002   | 0.69                                     | 0.000   | 1.50                                    | 0.000   | 0.82                                     | 0.000   |
| 4-(Heptyloxy)phenol                                                     | 0.93                                    | 0.002   | 1.05                                     | 0.000   | 1.21                                    | 0.000   | 1.06                                     | 0.000   |
| Diethylpyrocarbonate                                                    | 1.07                                    | 0.001   | 0.91                                     | 0.003   | 0.99                                    | 0.360   | 0.91                                     | 0.001   |
| 3-[(1R,2S,5R,6S)-5-Hydroxy-7-oxabicyclo<br>[4.1.0] hept-2-yl]-L-alanine | 1.14                                    | 0.000   | 1.02                                     | 0.054   | 0.93                                    | 0.000   | 1.18                                     | 0.022   |
| Valylserine                                                             | 0.93                                    | 0.158   | 0.97                                     | 0.007   | 0.83                                    | 0.000   | 1.06                                     | 0.001   |
| Cyclo (leucylprolyl)                                                    | 1.02                                    | 0.139   | 1.12                                     | 0.000   | 0.87                                    | 0.000   | 0.97                                     | 0.013   |
| Ketotifen                                                               | 1.15                                    | 0.000   | 1.03                                     | 0.003   | 1.07                                    | 0.001   | 0.89                                     | 0.000   |
